# Supplementary material
Source: Springer Nature journal article supplement (https://www.springermedizin.de/resource/supplementary/13058_2013_3552_MOESM17_ESM.pdf/9703940)

7 days 2nd pregnancy

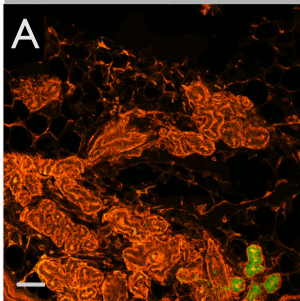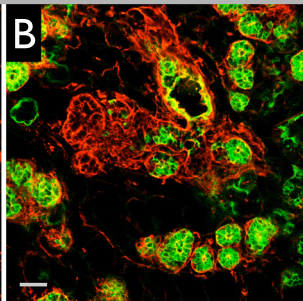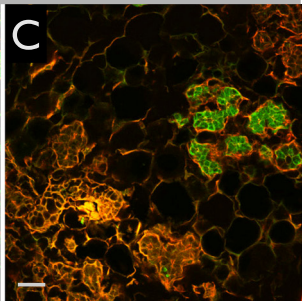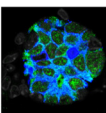

■ YFP total

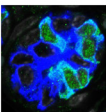

■ YFP partial

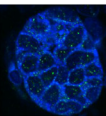

■ YFP neg

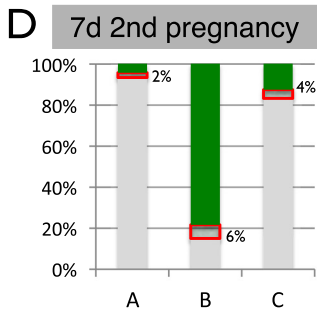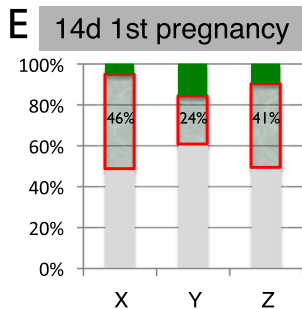

Supplement: MOESM17 [file 9703940]
